# Transcriptomics reveals patterns of sexually dimorphic gene expression in an avian hypothalamic–pituitary–gonadal (HPG) axis

Matthew MacManes<sup>1\*</sup>, Suzanne Austin<sup>2</sup>, Andrew Lang<sup>1</sup>, April Booth<sup>2</sup>, Victoria Farrar<sup>2</sup>, Rebecca M. Calisi<sup>2</sup>

<sup>1</sup> Department of Molecular, Cellular, and Biomedical Sciences. University of New Hampshire, Durham NH 03824

<sup>2</sup> Department of Neurobiology, Physiology, and Behavior. University of California, Davis. Davis CA. 95616

\* Corresponding author: [MacManes@gmail.com](mailto:MacManes@gmail.com), [@MacManes](https://twitter.com/MacManes)

Keywords: reproductive axis, rock dove, pigeon, *Columba livia*, gene expression, RNAseq, reproduction, sexual behavior

## ABSTRACT

The hypothalamic-pituitary-gonadal (HPG) axis is a key biological system required for reproduction and associated sexual behaviors to occur. In the avian model, the rock dove (*Columba livia*), we characterized the transcript community of each tissue of the HPG axis in both sexes. We report greater sex-biased differential expression in the pituitary (233 genes out of 15,102 genes) as compared to the hypothalamus (1 gene out of 15,102 genes), with multiple genes overexpressed in the male pituitary gland being related to locomotion, and multiple genes over-expressed in the female pituitary gland being related to reproduction, growth, and development. These genes may be associated with facilitating the different roles the HPG system plays in sex-specific reproductive behavior, including life-history strategies characterized by short-term payoffs in males (i.e. locomotion) and longer-term payoffs in females (i.e. development and reproduction). In addition, we report novel patterns of sex-biased expression in genes involved in reproduction-associated processes, including gonadotropin-releasing hormone-I, prolactin, progesterone receptor, androgen receptor, and arginine vasopressin-like receptor 1A. We discovered other interesting sex-biased patterns in genes that may play important, though currently unknown, roles in reproductive physiology and behavior, such as Betacellulin (*BTC*) and Ecto-NOX Disulfide-Thiol Exchanger 1 (*ENOX1*). In summary, we offer a resource to greatly expand our mechanistic insight into HPG activity. We report tissue-specific and sex-biased expression in genes commonly investigated when studying reproduction, highlighting the need for sex parity in all future studies. In addition, we uncover new targets of investigation in both sexes, which could potentially change our understanding of HPG function.

## INTRODUCTION

The hypothalamic-pituitary-gonadal (HPG) axis is a system comprised of endocrine glands whose function is vital to the regulation of reproduction and associated behaviors (Fig. 1). In all vertebrates studied, from humans to Agnatha, the jawless fishes, the HPG axis is present and its function is generally conserved (Sower et al., 2009). For reproduction to occur, the hypothalamus must produce and secrete gonadotropin-releasing hormone (GnRH), which causes the pituitary gland to secrete gonadotropins, luteinizing hormone (LH) and follicle stimulating hormone (FSH) (Plachetzki et al., 2016). LH and FSH travel through the bloodstream and act upon receptors in the gonads (i.e. testes or ovaries), stimulating gametogenesis and the secretion of sex steroids, such as testosterone and estradiol. These sex steroids then bind with receptors within the HPG axis to create a feedback system that facilitates reproduction and sexual behaviors. The HPG axis has been lauded for providing a

foundation to guide reproductive endocrinology investigations, but it has also been criticized as an overly simplistic depiction of the mechanisms mediating reproduction. Now, burgeoning genomic sequencing technologies afford us a deeper and more complete understanding of the mechanistic drivers of reproduction by allowing us to understand how differential gene expression between the sexes could underpin sexually dimorphic reproductive behavior, and how the full complement of genes expressed in the HPG axis could work in concert to define physiology and behavior (Calisi and MacManes 2015).

Previous understanding of HPG function has come about by measuring the amount of circulating hormones in blood, conducting immunochemistry to visualize protein presence or absence, conducting *in situ hybridization* to visualize a target gene, and the use of endocrine and receptor agonists and antagonists and their resulting physiological and behavioral effects. Due to recent technological advances, researchers are beginning to identify correlative and causative links between gene activity and phenotype (Saldanha et al., 2010; Dhillo et al., 2005; Lake et al., 2008; Zhang et al., 2008; Wang et al., 2011; Qin et al., 2014; Han et al., 2015). Concerning the genomics of reproduction, some studies have generated whole-organism or tissue-specific sequence data of which the HPG axis was a subset (Peterson et al., 2012; Cánovas et al., 2014). Even fewer studies have reported observing differential gene expression of the HPG axis as a global system (Xu et al., 2011). Here, we focus specifically on patterns of tissue and sexually dimorphic gene expression in the HPG axis of the rock dove (*Columba livia*) and discuss how they might relate to male and female reproductive strategies.

We characterize the first sex-specific avian HPG axis transcriptome using RNA extracted from whole hypothalamus, pituitary, and gonads of sexually mature male and female rock doves (*Columba livia*). We constructed an annotated *de novo* transcriptome assembly for these tissues, which then enabled us to quantify the abundance of all mRNA transcripts per tissue. By incorporating candidate gene and *ab initio* approaches across all tissue types and between sexes, we were able to both characterize general patterns of gene expression and identify specific patterns of sex-biased expression. It is our intention that these data illuminate sex differences in gene presence and abundance throughout the HPG axis when birds are at a basal state (i.e. reproductively mature but sampled when not actively breeding). By doing this, we create a resource for the scientific community to devise further studies of how gene expression patterns change over different reproductive stages and in response to physical and social events. These data may be useful for formulating potential therapeutic strategies for abnormal HPG axis function.

Figure 1. Illustration of the hypothalamus, pituitary, and gonads of male and female rock doves.

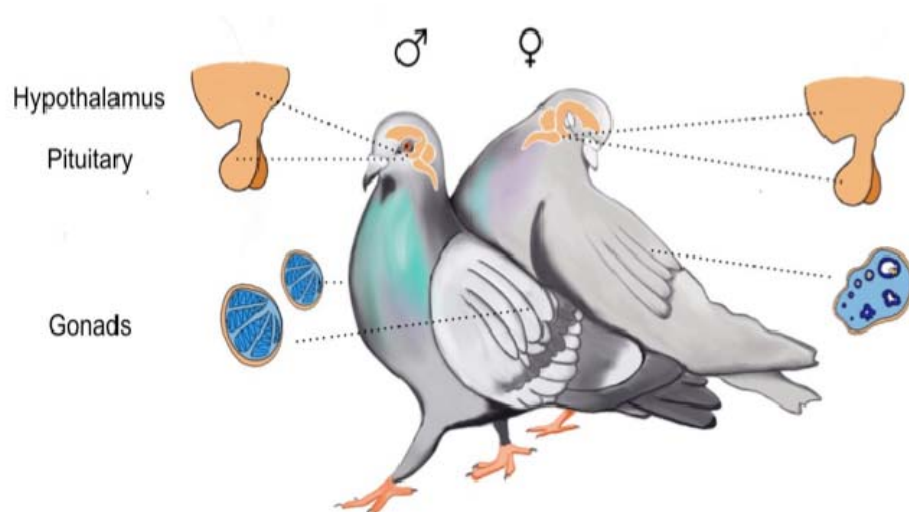

## Methods

### *Animal Collection Methods*

Birds were housed at the University of California, Davis, in large, outdoor aviaries (5'x4'x7'), with 8 sexually reproductive adult pairs per aviary. All birds were three years old and had been housed in their respective aviaries for one year at the time of collection. All birds were also successful breeders, having paired naturally and produced multiple clutches throughout the year thus far. However, to control for reproductive stage as much as was possible, all birds used in this study were sampled at a time when they were naturally without eggs or chicks, creating a type of "baseline" sampling point. All sampling occurred during the summer of 2016 between 10:00-11:30 (PST) to avoid potential seasonal and circadian rhythm confounds, and animal care and handling protocols were strictly followed (UC Davis IACUC #18895). Fourteen males and ten females were sacrificed within 3 min of entering their aviary. They were anesthetized using isoflurane prior to decapitation. Brains, pituitaries, and gonads were extracted and immediately placed on dry ice and transferred within the hour to a -80°C freezer until further processing. Frozen brains were coronally sectioned on a cryostat (Leica CM 1860) at 100µm and the hypothalamus was isolated using surgical punches. We used Karten and Hodoss' stereotaxic atlas (Karten and Hodoss, 1967) of the brain of the pigeon to locate the hypothalamus and collect it in its entirety. In brief, we, collected hypothalamic tissue beginning at the point of bifurcation of the tractus septomesencephalicus and ending after the cerebellum was well apparent.

Hypothalamic, pituitary, and gonadal tissue were preserved at -80°C in RNALater and shipped from the University of California, Davis, to the University of New Hampshire for further processing.

### ***Library Preparation and Sequencing***

Tissues frozen in RNALater were thawed on ice in an RNase-free work environment. Total RNA was extracted using a standard Trizol extraction protocol (Thermo Fisher Scientific, Waltham, MA). The quality of the resultant extracted total RNA was characterized using the TapeStation 2200 instrument (Agilent, Santa Clara, CA), after which Illumina sequence libraries were prepared using the TruSeq RNA Stranded LT Kit (Illumina). The TapeStation was, again, used to determine the quality and concentration of these libraries. Each library was diluted to 2nM with sterile ddH<sub>2</sub>O, and pooled in a multiplexed library sample. The multiplexed library sample was then sent to the New York Genome Center for 125 or 150 base pair paired-end sequencing on a HiSeq 2500 platform.

### ***Sequence Quality Control and Assembly***

Sequence read data were downloaded and quality checked using FastQC version 0.11.5 (Andrews, 2016). A *de novo* transcriptome for the HPG was assembled following the Oyster River Protocol for Transcriptome Assembly (MacManes, 2015). In brief, 59 million paired end reads from two individuals (1 male and 1 female) were error corrected using RCorrector version 1.0.2 (Song and Florea, 2015). Adapters, as well as bases with a Phred score <2 were trimmed using Skewer 0.2.2 (Jiang et al., 2014), and assembly was carried out using Trinity version 2.2.0 (Haas et al., 2013), Binpacker version 1.0 (Liu et al., 2016), and Shannon version 0.0.2 (Kannan et al., 2016), after which the resultant transcriptomes were merged using the software package transfuse version 0.5.0 (<https://github.com/cbournsnell/transfuse>). Lowly expressed transcripts, defined as those with an abundance of less than 0.5 transcript-per-million (TPM<0.5), were filtered out of the dataset. The resultant assembly was annotated using the software package dammit (<https://github.com/camillescott/dammit>), and evaluated using BUSCO 2.0 beta 3 (Simão et al., 2015) and TransRate version 1.0.1 (Smith-Unna et al., 2015).

### ***Mapping and Differential Gene Expression***

Raw reads were mapped to the annotated transcriptome after a quasi-mapping index was prepared using Salmon 0.7.0 (Patro et al., 2015). Rock dove transcripts were mapped to genes from the *Gallus gallus* genome version 5, using BLAST (Camacho et al., 2009). All data were

then imported into the R statistical package (version 3.3.0) (RStudio Team, 2015) using tximport (Soneson et al., 2015) for gene level evaluation of gene expression, which was calculated using edgeR (version 3.1.4) (Robinson et al., 2010) following TMM normalization and correction for multiple hypothesis tests by setting the false discovery rate (FDR) to 1%.

## **Gene Expression Evaluation**

Patterns of gene expression were evaluated using two distinct methods. First, we selected *a priori* genes of interest based on their known involvement in reproduction and associated behaviors (Table 3). Differences in gene expression were evaluated between these genes in the hypothalamic, pituitary, and gonadal tissues and between both sexes using a generalized linear model framework (expression ~ sex \* tissue) with post-hoc significance for all pairwise combinations of factors tested using the Bioconductor package lsmeans (<https://cran.r-project.org/package=lsmeans>). Second, a more global investigation of differential expression was conducted to characterize the general presence and expression of all genes per tissue and how they might differ between the sexes. A comparison of differential expression between tissues was not carried out secondary to results from preliminary analysis suggesting that most genes are expressed differently, thus, making meaningful comparisons uninformative. Instead, to characterize patterns of expression in each tissue, we generated a transcript presence/absence matrix (1=present, 0=absent) using median CPM (counts-per-million, generated in edgeR) > 10 as the metric. Overlaps were visualized using the R package UpSet (Lex et al., 2014). Gene ontology enrichment analysis was carried out using the Kolmogorov-Smirnov test (Young, 1977) for significance in the R package, topGO (Alexa and Rahnenfuhrer, 2010). Lastly, the putative chromosomal location of differentially expressed genes was evaluated by using the *Gallus* genome version 5.0 as a reference.

## **Results**

### **Sequence Read Data & Code Availability**

In total, 20 hypothalamus (11 male, 9 female), 23 pituitary (14 male, 9 female), 13 testes, and 10 ovary samples from 24 birds were sequenced. Each sample was sequenced with between 2.3 million and 24.5 million read pairs. All read data are available using the project ID PRJEB16136. Code used for the analysis of these data are available at <https://git.io/vPA09>.

### **Transcriptome Assembly and Evaluation**

The Rock Dove transcriptome assembly consists of 88,011 transcripts (available here

<https://goo.gl/PYrzas>, dryad on acceptance). This assembly, along with the annotations contained in gff3 format, is available at <https://goo.gl/DyZ8pw> (dryad on acceptance). The transcriptome contains 25,696 with at least 1 hit to the Pfam database, 46,854 hits to OrthoDB (Waterhouse et al., 2013), 51,522 hits to Uniref90, 3,108 hits to the transporter database (Saier et al., 2006), and 452 hits to Rfam (Griffiths-Jones et al., 2005). These 88,011 assembled transcripts map to 15,102 unique genes in the *Gallus* genome. The evaluation using BUSCO and TransRate are presented in Table 1 and 2 respectively.

Table 1: Quality control statistics for the assembled transcriptome: BUSCO metrics include statistics regarding the number of universal vertebrate single copy orthologs found in the assembly. 85.9% of the Avian BUSCOs were identified as full length (complete) sequences, while 4.3% were found to be fragmented. 27.5% were found in greater than 1 copy in the Rock Dove transcriptome.

|                 | BUSCO    |            |            |
|-----------------|----------|------------|------------|
|                 | Complete | Duplicated | Fragmented |
| Rock Dove 1.0.3 | 85.9%    | 27.5%      | 4.3%       |

Table 2: Quality control statistics for the assembled transcriptome: TransRate metrics are derived from mapping RNAseq reads to the assembly, with higher scores indicating a higher quality assembly. A score of 0.41 ranks this assembly higher than the majority of other published transcriptomes, with 90% of reads mapping, and only 2% of bases uncovered (no read support) and 0% contigs low-covered (mean per-base read coverage of < 10).

|                 | TRANSLATE |                   |               |                 |                         |                            |
|-----------------|-----------|-------------------|---------------|-----------------|-------------------------|----------------------------|
|                 | Score     | Number of Contigs | Assembly Size | Percent Mapping | Percent Bases Uncovered | Percent Contigs Lowcovered |
| Rock Dove 1.0.3 | 0.41      | 88011             | 146.8Mb       | 90              | 2                       | 0                          |



## ***Sequence Read Mapping and Estimation of Gene Expression.***

Raw sequencing reads corresponding to individual samples of hypothalami, pituitary glands, and gonads were mapped to the Rock Dove reference HPG transcriptome using Salmon, which resulted in between 70% and 80% read mapping. These mapping data were imported into R and summarized into gene-level counts using tximport, after which, edgeR was used to generate normalized estimates of gene expression. Patterns of transcript-expression overlap are presented in Figure 1. Of the 15,102 genes expressed in the HPG, 7,529 are expressed in all tissues (median CPM > 10 - Figure 1). A total of 746 transcripts are expressed in the ovary, hypothalamus, and pituitary, 732 are expressed uniquely in the testes, 529 uniquely in ovary, 418 uniquely in the hypothalamus, and 230 uniquely in the pituitary.



Figure 1. Description of transcript presence overlap in the HPG axis. Bars are annotated by connected dots which indicate a given number of transcripts expressed in those tissues. For example, 746 transcripts are expressed in the pituitary, hypothalamus, and ovary, but these genes are not expressed in the testes. Bars annotated by single blue dots indicate the number of transcripts expressed uniquely in that tissue. For example, 732 transcripts are expressed only in the testes.

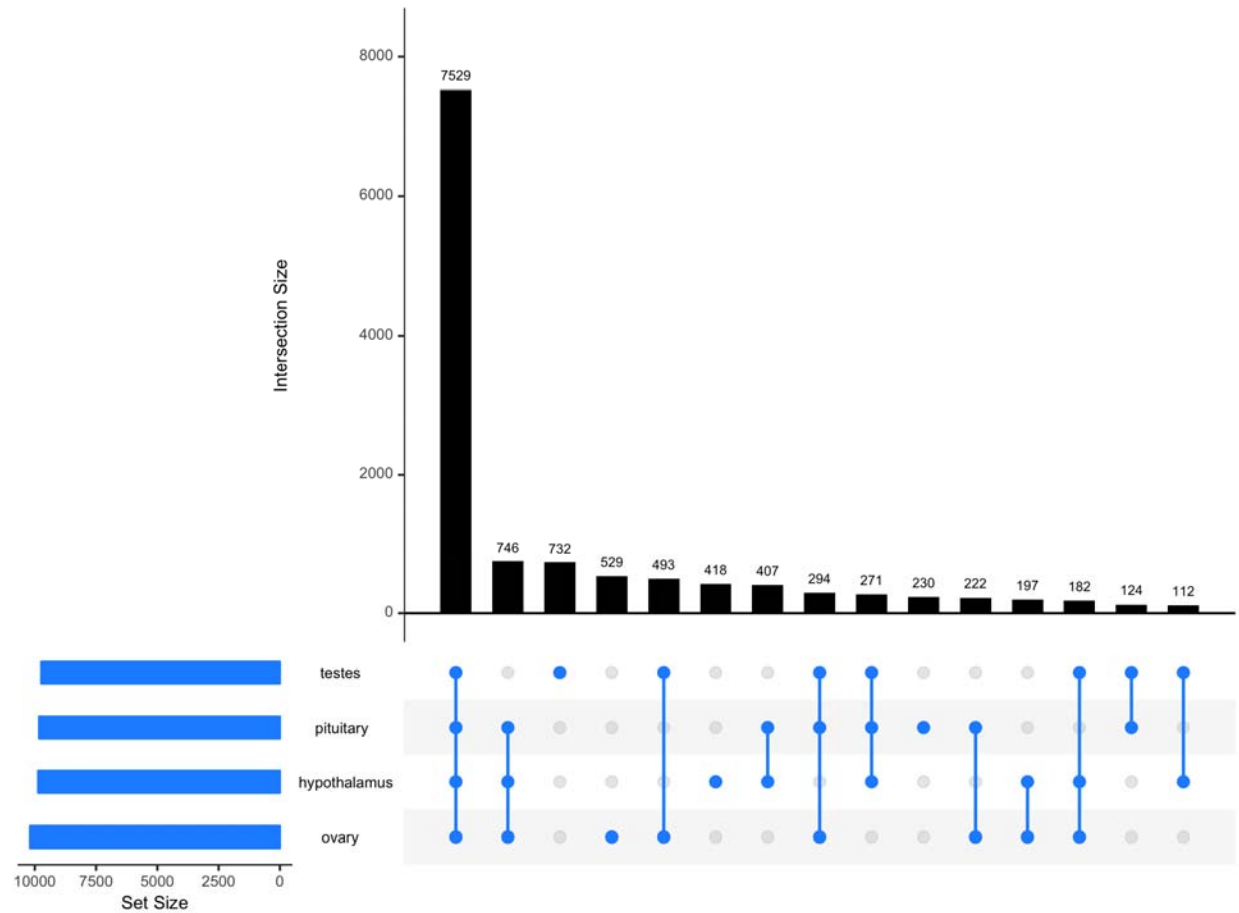

### Evaluation of Candidate Gene Expression.

Using the assembled transcriptome, we characterized expression in males and females across the HPG (e.g., Figure 2). For the candidate genes evaluated, which include gonadotropin releasing hormone (*GnRH-1*) and its receptor (*GnRH-1-R*), LH receptor (*LH-R*), FSH receptor (*FSH-R*), androgen receptor (*AR*), estrogen receptor alpha and beta (*ESR alpha*, *ESR beta*). In addition, we examined gonadotropin inhibitory hormone (*GnIH*), due to its inhibitory effect on the HPG axis and reproductive behavior (Calisi, 2014), vasoactive intestinal peptide (*VIP*), due to its

role in stimulating the release of the pituitary hormone, prolactin (Cloues et al., 1990), and its receptor (*VIP-R*), prolactin (*PRL*) due to its facilitation of parental care behaviors, including crop milk production (Silver, 1984), and its receptor (*PRL-R*), arginine vasopressin-like receptor 1A and 1B (*AVPR1A*, *AVPR1B*), mesotocin (*MT*) and its receptor (*MTR*), due to their role in social bonding behaviors (Kelly and Goodson, 2014; Ondrasek, 2016), progesterone receptor (*PGR*) due to its role in reproductive behavior (Liley, 1976), CYP19, which encodes the aromatase enzyme (*ARO*), which is responsible for the conversion of testosterone into estradiol (Balthazart and Ball, 2012).

Using a generalized linear model and least-squares means for post-hoc tests of significance ( $P < 0.05$ ), we uncovered greater expression of *GnRH-1-R*, *AR*, and *PGR* in the female pituitary as compared to the male pituitary (z-ratio 2.324, p-value = 0.0201; z ratio = -3.842, p-value = 0.0001; z ratio = 5.559, p-value = <.0001, respectively). We also found greater expression of *PRL* in the female pituitary (z ratio = 2.912, p-value = 0.0036) as compared to the male pituitary, but *PRL* was more highly expressed in the male hypothalamus as compared to the female hypothalamus (z ratio = -2.433, p-value = 0.0150). The *PRL* receptor was also more highly expressed in the male hypothalamus and pituitary gland as compared to corresponding female tissues (z ratio -2.674, p-value = 0.0075 and z ratio -2.564, p-value = 0.0104, respectively). Finally, we discovered greater expression of *AVPR1A* in the male pituitary as compared to the female pituitary (z ratio = -2.416, p-value = 0.0157).

Figure 2A-F. Box and whisker plots illustrating the differential expression between the sexes of four candidate genes. The Y-axis indicates levels of gene expression as presented by taking the log of transcripts per million plus one (TPM+1) while tissue and sex are presented on the X-axis. The bottom and top of the box indicates the first and third quartiles. The band inside the box is the median. Whiskers indicate the 95% confidence intervals of the data. \*\* denotes statistically significant differences in expression.

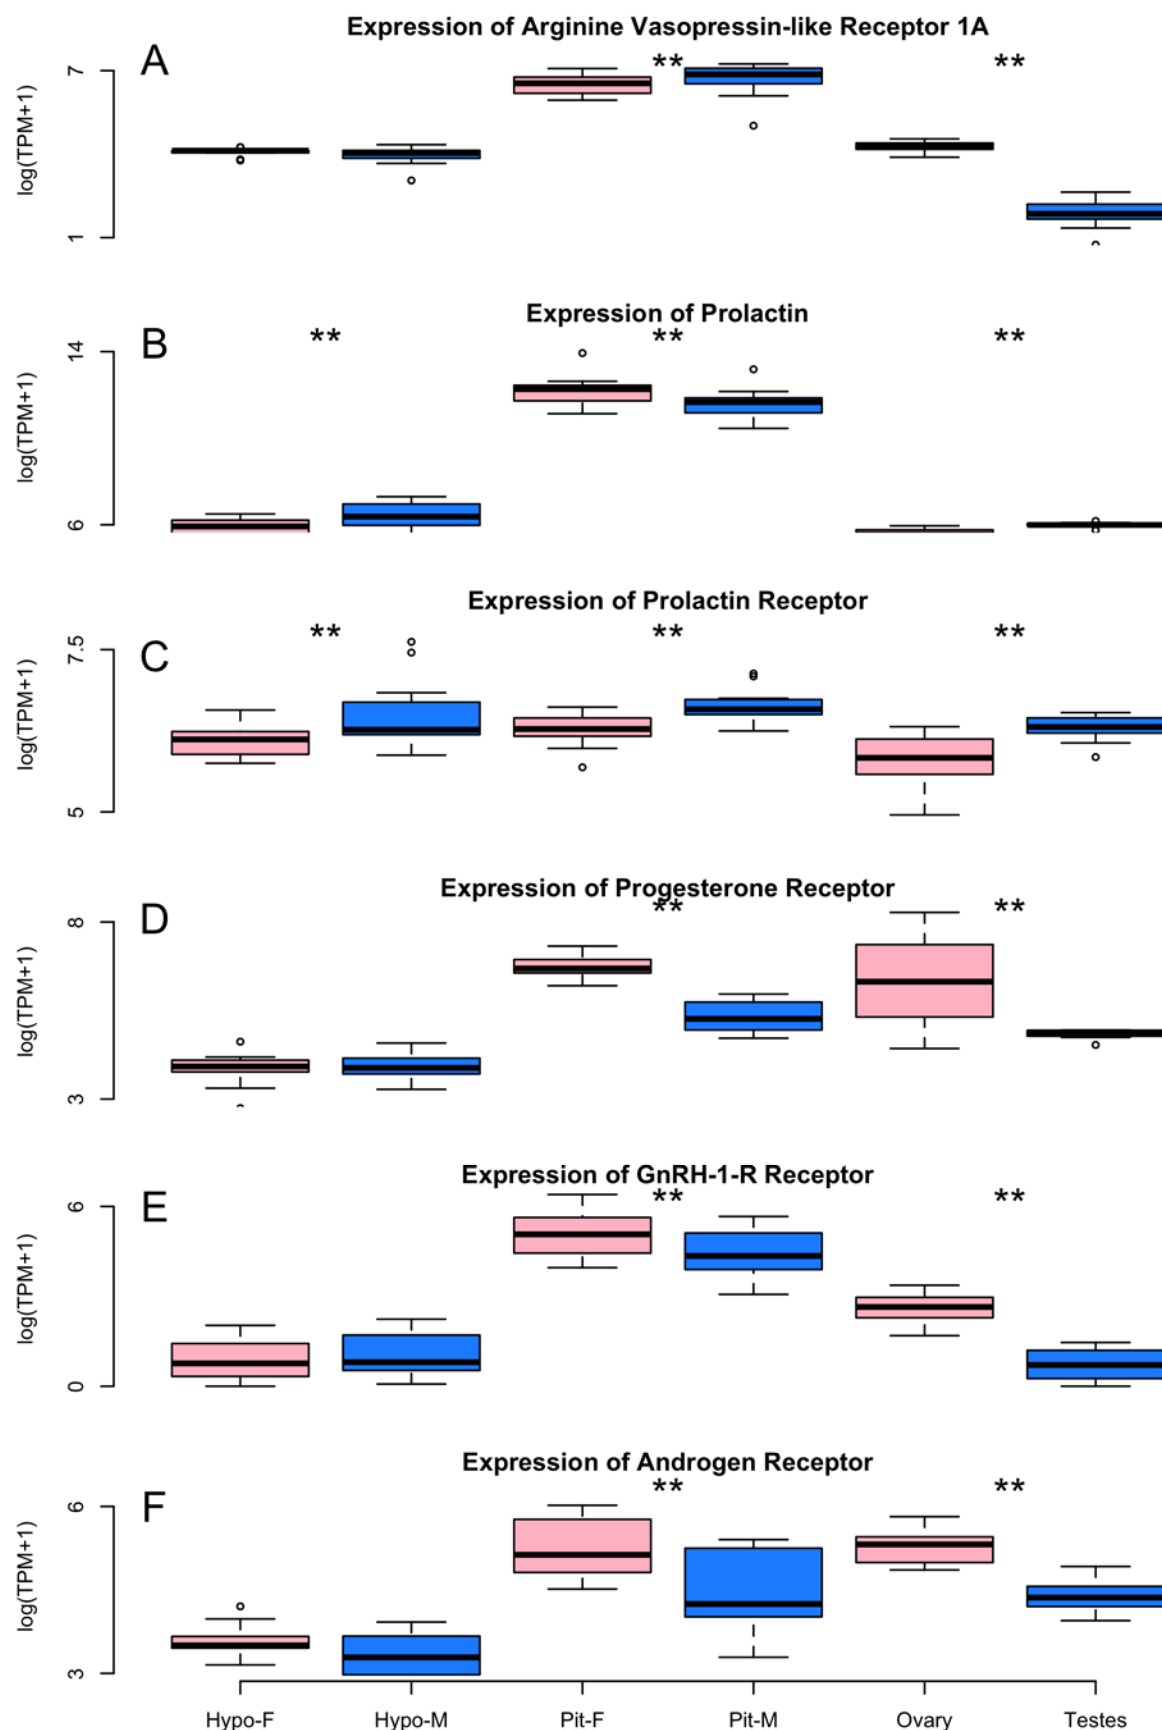

298 Table 3: Mean gene expression (normalized counts per million (CPM)) +/- standard deviation)  
299 for a list of candidate genes known to be important mediators of reproductive biology.

|                        | <b>Hypo</b>      |                  | <b>Pit</b>            |                       | <b>Gonads</b>    |                  |
|------------------------|------------------|------------------|-----------------------|-----------------------|------------------|------------------|
| <b>Gene</b>            | <b>Female</b>    | <b>Male</b>      | <b>Female</b>         | <b>Male</b>           | <b>Female</b>    | <b>Male</b>      |
| <b><i>GnRH-I</i></b>   | 116.1 +/- 75.9   | 142.3 +/- 121.6  | 0.3 +/- 0.5           | 1.3 +/- 2.3           | 0.6 +/- 0.7      | 1.2 +/- 1.1      |
| <b><i>GnRH-I-R</i></b> | 2.34 +/- 2.67    | 2.85 +/- 2.75    | 245.6 +/- 212.4       | 112.8 +/- 83.76       | 14.0 +/- 6.7     | 1.38 +/- 1.09    |
| <b><i>LH-R</i></b>     | 19.0 +/- 11.3    | 23.03 +/- 12.2   | 0.9 +/- 0.95          | 0.38 +/- 0.67         | 264.45 +/- 77.54 | 42.59 +/- 39.1   |
| <b><i>FSH-R</i></b>    | 4.02 +/- 4.42    | 5.13 +/- 2.62    | 9.4 +/- 3.75          | 11.5 +/- 5.62         | 151.59 +/- 80.2  | 181.0 +/- 51.56  |
| <b><i>AR</i></b>       | 37.7 +/- 13.4    | 27.8 +/- 13.1    | 226.6 +/- 121.4       | 111.1 +/- 72.7        | 204.1 +/- 62.5   | 80.3 +/- 23.1    |
| <b><i>ERa</i></b>      | 49.2 +/- 14.0    | 57.2 +/- 18.6    | 724.5 +/- 329.3       | 836 +/- 283.4         | 166.2 +/- 152.5  | 64.6 +/- 32.6    |
| <b><i>ERb</i></b>      | 41.9 +/- 18.7    | 36.1 +/- 14.5    | 53.8 +/- 16.5         | 58.6 +/- 27.9         | 173.4 +/- 90.5   | 7.4 +/- 3.9      |
| <b><i>GnIH</i></b>     | 287.8 +/- 148.7  | 383.2 +/- 510.0  | 4.0 +/- 3.8           | 2.9 +/- 3.1           | 0.1 +/- 0.2      | 0.7 +/- 0.7      |
| <b><i>VIP</i></b>      | 1.3e+02 +/- 60.1 | 1.3e+02 +/- 98.3 | 1.19 +/- 1.37         | .46 +/- .77           | 1.3e+01 +/- 15.6 | 0 +/- 0          |
| <b><i>VIP-R</i></b>    | 70.78 +/- 18.5   | 69.2 +/- 24.5    | 47.3 +/- 141.5        | 376.35 +/- 134.64     | 42.3 +/- 17.3    | 18.8 +/- 7.9     |
| <b><i>PRL</i></b>      | 389.9 +/- 170.4  | 766.0 +/- 436.7  | 295840.2 +/- 320026.2 | 136607.5 +/- 121634.2 | 250.9 +/- 95.2   | 397.9 +/- 45.1   |
| <b><i>PRL-R</i></b>    | 463.0 +/- 141.7  | 803.4 +/- 558.4  | 540.4 +/- 143.2       | 790.85 +/- 204        | 338.5 +/- 131.8  | 550.66 +/- 100.7 |
| <b><i>AVPR1A</i></b>   | 117.3 +/- 58.8   | 98.3 +/- 34.4    | 202.2 +/- 111.3       | 362.2 +/- 181.6       | 19.0 +/- 13.5    | 3.2 +/- 2.3      |
| <b><i>AVPR1B</i></b>   | 5.4 +/- 5.4      | 5.4 +/- 3.1      | 1538.3 +/- 503.5      | 1900.1 +/- 709.1      | 3.8 +/- 1.3      | 2.3 +/- 1.5      |
| <b><i>MT</i></b>       | 264.9 +/- 82.1   | 206.9 +/- 101.1  | 173 +/- 39.9          | 172.78 +/- 60.9       | 182.11 +/- 265.4 | 11.1 +/- 2.98    |
| <b><i>MTR</i></b>      | <1               | <1               | <1                    | <1                    | <1               | <1               |
| <b><i>PGR</i></b>      | 50.6 +/- 24.6    | 51.4 +/- 20.8    | 874.4 +/- 294.9       | 216.7 +/- 82.6        | 1004.6 +/- 1193  | 126.7 +/- 14.4   |
| <b><i>CYP19</i></b>    | 212.6 +/- 137.5  | 325.8 +/- 200.2  | 26.4 +/- 10.3         | 49.5 +/- 20.2         | 786.6 +/- 446.2  | 1.7 +/- 1.3      |

300

### 301 ***Global Evaluation of Gene Expression***

302 Analysis of global patterns of gene expression, aimed at uncovering previously unknown sex-  
303 specific differences in gene expression in the hypothalamus and pituitary by examining the

entire transcriptome, was conducted using edgeR. After controlling for over 15,000 comparisons, we normalized the count data using the TMM method (McCarthy et al., 2012), which is done by finding a set of scaling factors for the library sizes that minimize the log-fold changes between the samples for most genes. This analysis revealed sex-specific differences in gene expression, particularly in the pituitary, where 119 genes were more highly expressed in males, while 124 genes were more highly expressed in females (Figure 3). The five most differentially expressed genes are Zinc Finger AN1-Type Containing 5 (*ZFAND5*), Betacellulin (*BTC*) which appears to be responsive to LH (Park et al., 2004), Cbp/P300 Interacting Transactivator With Glu/Asp Rich Carboxy-Terminal Domain 4 (*CITED4*), Growth Regulation By Estrogen In Breast Cancer 1 (*GREB1*) which is regulated by estrogen (Ghosh et al., 2000), and Kinesin Family Member 24 (*KIF24*). All had false discovery rates (FDR) < 7e-09. The full table of differentially expressed genes is available at <https://git.io/vXJWp>, which includes several tantalizing novel candidates, including Ecto-NOX Disulfide-Thiol Exchanger 1 (*ENOX1*; Fig. 4). In contrast to the pituitary, the hypothalamus exhibited only a single differentially expressed gene. That gene was potassium voltage-gated channel subfamily Q member 1 (*KCNQ1*, FDR =0.007). *KCNQ1*, which we found to be more highly expressed in females, is known to be imprinted (expressed in a parent-of-origin-specific manner) in mammals (Lee et al., 1997).

A number of expression patterns in the pituitary were identified by gene ontology analysis, which uses a controlled vocabulary to describe gene function and relationships between these terms. First, gene ontology terms that describe genes differentially expressed in the female pituitary (Table 4) are clustered around terms related to the binding of lipid-based hormones, immune function, growth, and development. Gene ontology terms from genes differentially expressed in male pituitary (Table 5) are clustered around terms related to muscles and movement.

Figure 3. MA plot for the *ab initio* comparison between genes differentially expressed in the male and female pituitary. Red dots indicate statistically different genes. Those with positive values on the log fold change (logFC) Y axis are more highly expressed in the male pituitary, while those with negative values are more highly expressed in the female pituitary. The x-axis is a measure of gene expression, with higher numbers indicating higher levels of gene expression.

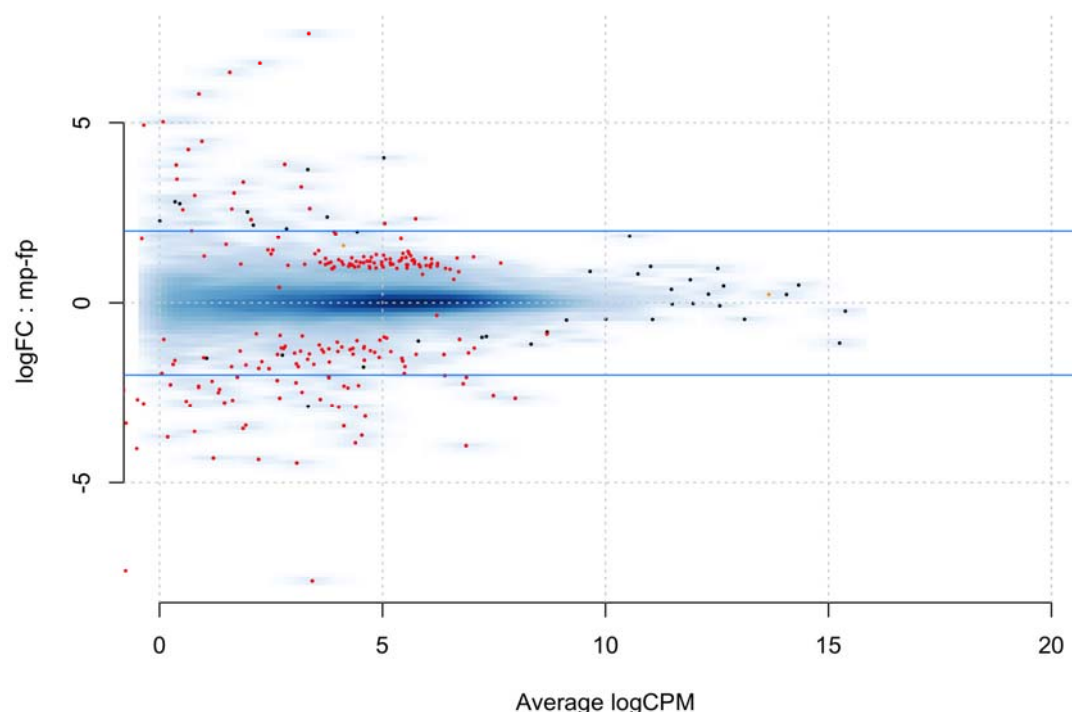

Figure 4. Box and whisker plots illustrating sex-biased expression of two genes, Betacellulin (*BTC*) and Ecto-NOX Disulfide-Thiol Exchanger 1 (*ENOX1*), identified using our global analysis. The Y-axis indicates levels of gene expression as presented by taking the log of transcripts per million plus one (TPM+1) while tissue and sex are presented on the X-axis. The bottom and top of the box indicates the first and third quartiles. The band inside the box is the median. Whiskers indicate the 95% confidence intervals of the data. \*\* denotes statistically significant differences in expression.

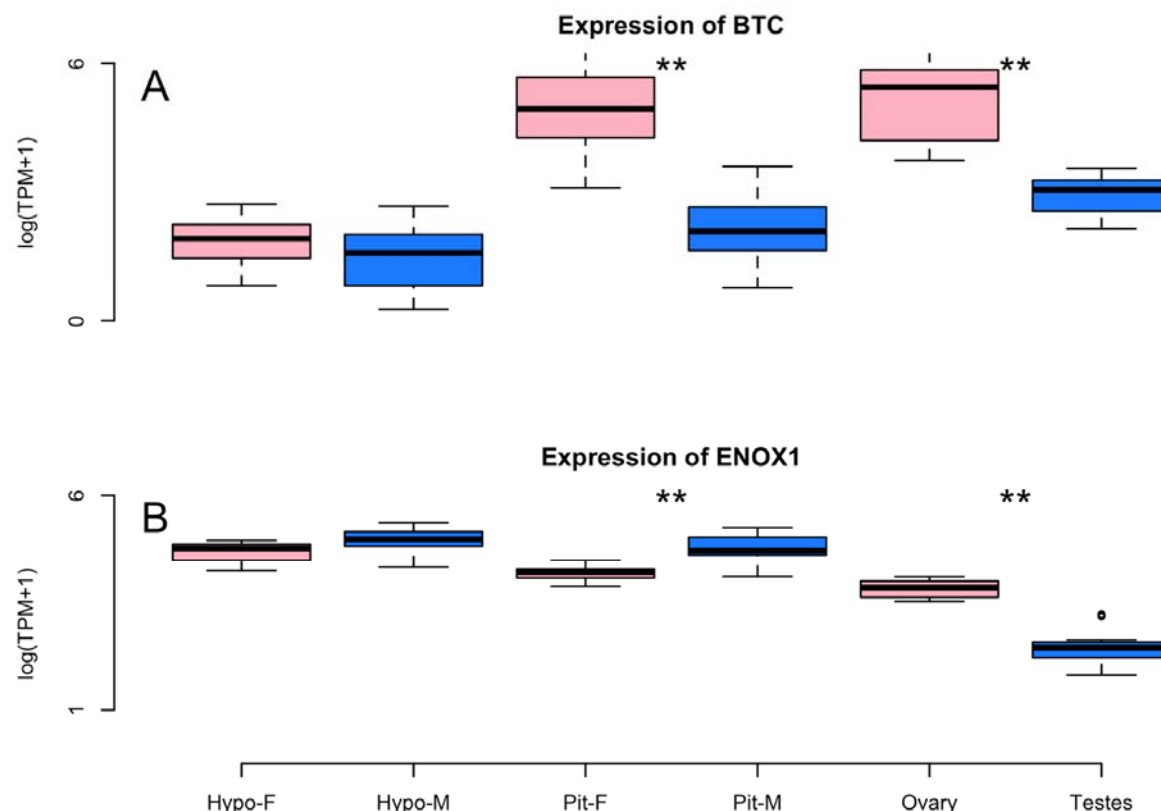



**Table 4: Top 20 Gene Ontology (GO) Terms** describing differentially expressed genes in the female pituitary gland. These terms describe the putative function of genes using a controlled vocabulary. Abbreviations: Ontology (Ont), Molecular Function (MF), Biological Processes (BP). N signifies the number of genes in the entire dataset that are linked to the specific ontology term. F+ indicates the number of differentially expressed genes significantly upregulated in the female pituitary, while M+ indicates the number of expressed genes significantly upregulated in the male pituitary. Results are limited to terms where the specific term contains >4 genes.

| GO number         | Term                                                  | Ont | N   | F+ | M+ | P-value  |
|-------------------|-------------------------------------------------------|-----|-----|----|----|----------|
| <b>GO:0008289</b> | lipid binding                                         | MF  | 50  | 6  | 1  | 1.92E-05 |
| <b>GO:0048469</b> | cell maturation                                       | BP  | 13  | 3  | 0  | 4.29E-04 |
| <b>GO:0021700</b> | developmental maturation                              | BP  | 18  | 3  | 0  | 1.18E-03 |
| <b>GO:0043178</b> | alcohol binding                                       | MF  | 7   | 2  | 0  | 2.93E-03 |
| <b>GO:0033293</b> | monocarboxylic acid binding                           | MF  | 8   | 2  | 0  | 3.88E-03 |
| <b>GO:0014066</b> | regulation of phosphatidylinositol 3-kinase signaling | BP  | 8   | 2  | 0  | 3.88E-03 |
| <b>GO:0006869</b> | lipid transport                                       | BP  | 27  | 3  | 2  | 3.92E-03 |
| <b>GO:0007548</b> | sex differentiation                                   | BP  | 27  | 3  | 0  | 3.92E-03 |
| <b>GO:0010876</b> | lipid localization                                    | BP  | 29  | 3  | 2  | 4.82E-03 |
| <b>GO:0048017</b> | inositol lipid-mediated signaling                     | BP  | 9   | 2  | 0  | 4.95E-03 |
| <b>GO:0014065</b> | phosphatidylinositol 3-kinase signaling               | BP  | 9   | 2  | 0  | 4.95E-03 |
| <b>GO:0048015</b> | phosphatidylinositol-mediated signaling               | BP  | 9   | 2  | 0  | 4.95E-03 |
| <b>GO:0005496</b> | steroid binding                                       | MF  | 9   | 2  | 0  | 4.95E-03 |
| <b>GO:0005319</b> | lipid transporter activity                            | MF  | 10  | 2  | 1  | 6.14E-03 |
| <b>GO:0043627</b> | response to estrogen                                  | BP  | 10  | 2  | 0  | 6.14E-03 |
| <b>GO:0004867</b> | serine-type endopeptidase inhibitor activity          | MF  | 12  | 2  | 0  | 8.86E-03 |
| <b>GO:0042698</b> | ovulation cycle                                       | BP  | 13  | 2  | 0  | 1.04E-02 |
| <b>GO:0022602</b> | ovulation cycle process                               | BP  | 13  | 2  | 0  | 1.04E-02 |
| <b>GO:0005102</b> | receptor binding                                      | MF  | 114 | 5  | 0  | 1.07E-02 |
| <b>GO:0046545</b> | development of primary female sexual characteristics  | BP  | 14  | 2  | 0  | 1.20E-02 |

**Table 5: Gene Ontology (GO) Terms** describing genes differentially expressed genes in the male pituitary gland. These terms describe the putative function of genes using a controlled vocabulary. Abbreviations: Ont= Ontology (Ont), MF (Molecular Function (MF), BP (Biological Processes (BP). N signifies= the number of genes in the entire dataset that are linked to the specific ontology term. F+ indicates the number of differentially expressed genes significantly upregulated in the female pituitary, while M+ indicates the number of expressed genes significantly upregulated in the male pituitary. Results are limited to terms where the specific term contains >4 genes.

| GO number         | Term                              | Ont | N   | F+ | M+ | P-value  |
|-------------------|-----------------------------------|-----|-----|----|----|----------|
| <b>GO:0006936</b> | muscle contraction                | BP  | 21  | 0  | 4  | 3.90E-04 |
| <b>GO:0006941</b> | striated muscle contraction       | BP  | 10  | 0  | 3  | 5.53E-04 |
| <b>GO:0003012</b> | muscle system process             | BP  | 26  | 0  | 4  | 9.15E-04 |
| <b>GO:0050879</b> | multicellular organismal movement | BP  | 4   | 0  | 2  | 1.77E-03 |
| <b>GO:0050881</b> | musculoskeletal movement          | BP  | 4   | 0  | 2  | 1.77E-03 |
| <b>GO:0003009</b> | skeletal muscle contraction       | BP  | 4   | 0  | 2  | 1.77E-03 |
| <b>GO:0008092</b> | cytoskeletal protein binding      | MF  | 101 | 1  | 6  | 7.20E-03 |
| <b>GO:0003779</b> | actin binding                     | MF  | 53  | 0  | 4  | 1.28E-02 |

## **Discussion**

The HPG axis is a system comprised of endocrine tissues whose function is vital to the regulation of reproduction and associated behavior. Here, we report patterns of gene expression amongst tissues of the HPG axis as well as patterns of sex-biased gene expression within them. We describe patterns of tissue-specific expression and shared incidence of expression between tissues, providing an important picture of the functional-connectivity of these tissues. We also describe sex-biased patterns of gene expression for a set of candidate genes, currently known to play important roles in reproduction and associated behaviors. Lastly, we use an *ab initio* approach to identify all differentially expressed transcripts between male and female pituitary and hypothalamus. Our findings provide a vital resource for behavioral biologists examining the molecular basis of reproductive behavior, and fodder for researchers investigating the

mechanisms underlying fundamental physiological and behavioral differences in males and females.

***The Columba livia HPG transcriptome.*** We present an HPG transcriptome that is substantially complete, with fewer than 10% of universal avian orthologs missing (Table 1). This number suggests that all, or nearly all, transcripts present in the avian HPG have been successfully reconstructed, and the missing avian orthologs may be expressed in tissues other than those studied here. The transcriptome is structurally sound, as is evident from its TransRate score of .41, with 90% of reads mapping concordantly to the assembled reference (Table 2).

Our analysis of patterns of gene expression (Figure 1) revealed that nearly half of all genes expressed anywhere in the HPG axis are expressed ubiquitously. Of transcripts that are expressed uniquely in one tissue, the testis contains the most (n=746), followed by the ovary (n=529), hypothalamus (n=418), and pituitary (n=230). Interestingly, dyads (genes expressed only in pairs of tissues) follow an expected pattern, with the number of genes expressed uniquely in the gonads (testes + ovary) being more than the number of genes expressed uniquely in the pituitary and hypothalamus, followed by the pituitary and ovary, hypothalamus and ovary, pituitary and testes, and hypothalamus and testes dyads.

***Evaluation of Candidate Gene Expression.*** Decades of previous research describing the HPG axis and its role in reproductive biology have elucidated much of the molecular machinery underlying phenotypes (Nelson and Kriegsfeld, 2017). Based on this previous work, we targeted well-known substrates involved in the facilitation and mediation of reproductive processes and their associated behaviors for investigation (Table 3). Other genes not highlighted here can be found at <https://git.io/vXJW>.

We discovered previously unrecognized sex-specific differences in several of these candidate genes. Arginine vasopressin-like receptor 1A (*AVPR1A*) is known to be implicated in reproductive behaviors such as pair-bonding and parental care (Walum et al., 2008; Turner et al., 2010; Castelli et al., 2011; Staes et al., 2015). *AVPR1A* is most highly expressed in the pituitary, followed by the ovary, the hypothalamus, and lastly the testes. We found statistically significant differences in expression of this gene in the pituitary, with expression of this gene to be 1.8x higher in males as compared to females. Although a small number of studies have investigated sex-specific differences in gene expression (Nishida et al., 2005; Shan et al., 2013;

Trabzuni et al., 2013), including one in which expression in males was linked to pair-bond formation (Lim et al., 2004), it is not well known if *AVPR1A* is differentially expressed by sex. As fields of behavior and genomics further integrate, links between sex-specific roles in pair-bonding and reproductive behavior in the context of corresponding differences in gene expression will transform the way we understand how behavior is regulated.

We also investigated other candidate genes involved in reproduction and associated behaviors. Prolactin (*PRL*) is an important promoter of parental care, promoting lactation (Angelier and Chastel, 2009) and related to appetite and weight gain (Buntin et al., 1999). We found *PRL* to be more highly expressed in the male hypothalamus as compared to the female hypothalamus. The receptor for prolactin (*PRL-R*) was also more highly expressed in the male hypothalamus and pituitary as compared to females. In contrast, *PRL* was more highly expressed in the female pituitary as compared to the male pituitary. Though this species exhibits bi-parental care, including the production of crop milk by both males and females, neither sex was caring for eggs or chicks at the time of collection to help control for potential reproductive stage confounds. However, the interesting sexually-biased differences we note in inter-tissue gene expression inspires the question as to whether *PRL* is regulated in a sex-specific manner to produce a sex-specific result? Or, despite the difference in location of expression, does *PRL* activation lead to sexually monomorphic prolactin-mediated reproductive processes and behaviors? Post our discovery that *PRL* expression differs relative to sex and tissue of the HPG axis, the next step would be to investigate how the action of *PRL* on each of these tissues manifests in males versus females.

In addition, we found *GnRH-1-R*, *AR*, and *PRG* to more highly expressed in the female pituitary as compared to the male pituitary. GnRH-1, produced in the hypothalamus, is a major mediator of gonadotropin release in the pituitary, where these receptors are upregulated in females as compared to males. These gonadotropins signal the gonads to produce androgens, which feedback onto their receptors along the HPG axis. Here, we see those receptors are upregulated in females as compared to males. Females tend to have lower circulation of androgens than males, so could this be a way to increase sensitivity to androgen signals in females? Finally, progesterone receptor is associated with the mediation of female breeding cycles (Askew et al., 1997), but it can also serve as an important precursor to the creation of multiple hormones in males and females, including testosterone and estradiol. We found that the androgen receptor is more highly expressed in the female pituitary relative to the male

pituitary. While expression in both sexes has been linked to reproductive development (Wacker et al., 2010; Walters et al., 2012; Chang et al., 2013), to our knowledge, sex differences in expression have never been reported. To better elucidate the phenomenon of these sexually-dimorphic genetic expression phenotypes, further studies of functional genomics are required. Indeed, study of the most well-characterized candidate genes underlying reproductive behavior could reveal important and previously unrecognized sex-differences in expression. As the field of behavioral genomics advances, important questions to ask will be, are these differences biologically relevant, and if so, how do differences in expression lead to differences in behavior and reproductive output? Future work focused on these relationships will significantly shape our understanding of the molecular mechanisms underlying the observed patterns.

**Global Evaluation of Gene Expression.** Avian reproductive behavior has been shown to be heavily influenced by the endocrine function of the hypothalamus, pituitary, and gonads. Although sex-biased differences in vertebrate reproductive behavior have been well-noted, data on sex-specific patterns of gene expression that could be influencing these behaviors are lacking. This may largely be due to the novelty of various genomic technologies and the expense of collecting such data. However, it is becoming increasingly feasible and affordable to conduct such studies, making possible the potential for a more integrative understanding of reproductive behavior (Calisi and MacManes, 2015). Thus, in addition to investigating sexually dimorphic candidate gene expression in the HPG axis, we used an *ab initio* RNAseq approach to explore differences in *all* sexually dimorphic HPG gene expression in each tissue. The newly discovered sex-biased genetic differences that we report have the potential to offer a more in-depth picture of sexual dimorphism at the molecular level.

To conduct a global analysis of gene expression, we compared levels of expression in the tissues of the HPG shared by both sexes, the pituitary glands and hypothalami. Unlike our previous analyses where we targeted genes of interest, here we analyzed all genes expressed, controlling for over 15,000 multiple comparisons. We uncovered 233 sex-based differentially-expressed genes in the pituitary: 119 were more highly expressed in males, while 124 were more highly expressed in females. A table detailing differences in expression of all expressed genes, including those statistically and non-statistically differentially expressed, can be accessed at <https://git.io/vXJWp>. In contrast, only a single gene, the potassium voltage-gated channel subfamily Q member 1 (*KCNQ1*), was statistically differentially expressed in the hypothalamus (full table available here <https://git.io/vXJW5>). This profound disparity in patterns

of differential expression between hypothalamic and pituitary tissues begs a question of function - how do the different tissues of the HPG axis contribute to physiological and behavioral differences between males and females? Is the pituitary more involved in the maintenance of sex-specific physiology and behavior than the hypothalamus? Studies comparing gene expression in males and females are rare - most often studies have combined the sexes (but see (Nishida et al., 2005; Weickert et al., 2009; Zhang et al., 2011; Balakrishnan et al., 2012; Sun et al., 2012; Shan et al., 2013; Trabzuni et al., 2013; Jansen et al., 2014; Hodes et al., 2015). However, Nishida and colleagues (Nishida et al., 2005) found similar patterns of gene expression in mice, reporting that 43 genes were more highly expressed in the female pituitary while only 3 were more highly expressed in the hypothalamus as compared to males. Could this pattern of sex-biased expression be conserved across vertebrates, and if so, can we conclude that the pituitary, more so than the hypothalamus, plays a greater role in the maintenance of sex-specific reproductive physiology and behavior?

Gene ontology analysis of the differential expression in the pituitary revealed interesting patterns of enrichment, meaning it revealed interesting patterns of gene expression related to a common biological function or process. Gene ontology terms enriched for genes expressed more highly in males were often related to motor function. In contrast, ontology terms in genes more highly expressed in females aligned more closely with growth and development processes. These differences may reflect fundamental differences in male versus female life strategies, where males may invest more heavily in immediate payoff activities, while females may invest more in longer-term payoff events. Rock doves are socially monogamous and offer bi-parental care, making them behaviorally similar in many ways. However, mate choice among rock doves is complex with many factors such as social dominance, age, reproductive experience, size, parasite load, and color morph contributing to selection (Burley, 1981; Johnston and Johnson, 1989; Clayton, 1990). Females are the choosier sex (Burley, 1981), and males engage in extensive courtship displays to attract and secure a pair bond (Goodwin 1983). These displays include “bow-coos”, assuming an upright posture, inflating the crop, strutting, and tail dragging (Abs, 1983), displays that likely indicate some measure of male quality (Fusani et al., 2014). A display flight may also be undertaken where males fly from a perch and clap their wings several times prior to gliding, with wings raised and tail spread (Goodwin 1983). A study on the aerodynamics of a similar display flight in Eurasian collared doves, *Streptopelia decaocto*, suggests that high muscle power is required for this type of sexual display (Usherwood, 2008). These flights were not energetically expensive, accounting for



approximately 5% of basal metabolic rate, and may be a relatively inexpensive display to indicate male health. Indeed, recent work suggests that neuromuscular control may be used by females to select mates (Fusani et al., 2014). Male golden-collared manakins engage in elaborate displays that require extremely fine-tuned neuromuscular control. Neuromuscular sex differences seem to require androgenic and estrogenic signals to certain skeletal muscles which readies these tissues for courtship behaviors (Fusani et al., 2014). Males also engage in physical activities such as mate-guarding and “driving” behaviors, which may be a means of preventing extra pair copulations (Lovell-Mansbridge and Birkhead, 1998). Because of these physically demanding events, our assessment of gene ontology terms enriched for genes more highly expressed in males seems to support this idea that differential expression could be related to motor function associated with male reproductive behaviors, and this function could be regulated more heavily by the pituitary as compared to the hypothalamus.

Gene ontology terms enriched for genes expressed more highly in the female pituitary were often related to aspects of female growth and development. This may be due to their varying stages of follicular development. Females, unlike males, must grow and maintain follicles and the oviduct, which is energetically costly (Vézina et al., 2003). In a passerine species, females increased their resting metabolic rate by 22% during egg laying, of which 18% was attributed to maintenance of the oviduct (Vézina et al., 2003). While birds in our study were not actively nesting, we could not control for reproductive stage of the gonads. When we extracted female gonads, we found that they were experiencing different stages of follicular development. Some birds had regressed follicles, but many had a follicular hierarchy. The presence of follicular hierarchy could explain the presence of gene ontologies related to ovulation. Similarly, lipid binding and transport may be associated with follicular development because females are laying down lipid-rich yolk. On the other hand, males never had regressed testes. The active state of the male gonads is typical of pigeons who breed year-round, except for a brief photorefractory period in the North temperate fall where they may regress (Murton and Westwood, 1977). Gonads of females are more plastic and vary with the presence of suitable mates and breeding stage (Murton and Westwood 1977).

Using the global analysis approach, we were able to identify sex-biased differentially expressed genes that have not previously been targeted for investigation of HPG function. Such findings that are yielded from this discovery-based approach offer promising targets for future study, inspiring new lines of investigation (Calisi and MacManes, 2015). One particularly promising



target for understanding sex differences in reproductive biology is Betacellulin (*BTC*), which is highly expressed in the female pituitary as compared to the male pituitary (4.4 FC - Figure 4A). *BTC* is an epidermal-like growth hormone known to regulate female reproduction (Gratao et al., 2008) via mediation of LH (Park et al., 2004) and regulation of progesterone receptors (Shimada et al., 2006). In addition to being differentially expressed in the pituitary, it is also highly expressed in the female ovary, but not the hypothalamus. It is lowly expressed, but present in all male tissues, which begs the question, what role could *BTC* have in male reproductive physiology, if any?

The Ecto-NOX Disulfide-Thiol Exchanger 1 (*ENOX1*) gene, an electron transport gene, is more highly expressed in the male pituitary relative to the female pituitary (1.2x FC - Figure 4B). This gene, known to be involved in circadian rhythms (Dick et al., 2013), has also been associated with weight gain (Serão et al., 2013), litter size in the pig (Sell-Kubiak et al., 2015), and eggshell thickness in a genome-wide association study (GWAS) of chickens (Liu et al., 2011). What role this gene plays in the pituitary, and specifically in the male pituitary, where it is differentially expressed, is completely unclear. Further work aimed at understanding this and the other differentially expressed genes can be the key to gaining the most complete understanding yet of how the HPG axis functions.

## **Summary**

Neurobiologists have described many important characteristics of the molecular basis for reproductive behaviors, including the characterization of multiple genes expressed in the HPG axis that are critical to reproduction. Our sex-specific, global analyses have uncovered hundreds of sexually-biased genes. These genes provide novel clues to assist behavioral biologists and functional genomicists in more fully understanding the mechanisms underlying sexual dimorphism in reproductive behaviors. Indeed, future work can now use this information to better understand causal relationships and functions of genes expressed differently in males and females.

In conclusion, we reveal patterns of tissue specific and sexually dimorphic gene expression in the HPG axis. We report sex-biased expression in genes commonly investigated when studying reproduction. In addition, we offer up promising new targets of investigation that could lead to a better understanding of HPG function in both sexes. Our results highlight the need for sex parity

in transcriptomic studies, providing new lines of investigation of the mechanisms of reproductive function.

# **Acknowledgements:**

This work is supported by NSF IOS 1455960 to RMC and MM. We thank Jesse Krause, Jonathan Pérez, and members of the Calisi Lab for their help in maintaining the rock dove aviaries and aiding in tissue collection. We also thank Stacia Sower, Samuel Díaz-Muñoz, and the University of California, Davis, Environmental Endocrinology Group (EEG), comprised of the labs of Rebecca Calisi, Tom Hahn, Marilyn Ramenofsky, Karen Ryan, and John Wingfield, for their comments on this project and manuscript. We are grateful to Natalia Duque for her illustration (Fig. 1).

# **REFERENCES**

- Abs M (1983) Physiology and Behaviour of the Pigeon. Academic Press.
- Alexa A, Rahnenfuhrer J (2010) topGO: enrichment analysis for gene ontology. R package version 2 Available at: <http://bioconductor.uib.no/2.7/bioc/html/topGO.html>.
- Andrews SR (2016) FastQC. Available at: <http://www.bioinformatics.babraham.ac.uk/projects/fastqc/>.
- Angelier F, Chastel O (2009) Stress, prolactin and parental investment in birds: a review. Gen Comp Endocrinol 163:142–148.
- Askew JA, Georgiou GC, Sharp PJ, Lea RW (1997) Localization of progesterone receptor in brain and pituitary of the ring dove: influence of breeding cycle and estrogen. Horm Behav 32:105–113.
- Balakrishnan CN, Lin Y-C, London SE, Clayton DF (2012) RNA-seq transcriptome analysis of male and female zebra finch cell lines. Genomics 100:363–369.
- Balthazart J, Ball G (2012) Brain Aromatase, Estrogens, and Behavior. OUP USA.
- Buntin JD, Hnasko RM, Zuzick PH (1999) Role of the ventromedial hypothalamus in prolactin-induced hyperphagia in ring doves. Physiol Behav 66:255–261.
- Burley N (1981) MATE CHOICE BY MULTIPLE CRITERIA IN A MONOGAMOUS SPECIES. Am Nat 117:515–528.
- Calisi RM (2014) An integrative overview of the role of gonadotropin-inhibitory hormone in behavior: Applying Tinbergen’s four questions. Gen Comp Endocrinol 203:95–105.
- Calisi RM, MacManes MD (2015) RNAseq-ing a more integrative understanding of animal behavior. Current Opinion in Behavioral Sciences 6:65–68.

645 Camacho C, Coulouris G, Avagyan V, Ma N, Papadopoulos J, Bealer K, Madden TL (2009)  
646 BLAST+: architecture and applications. BMC Bioinformatics 10:421.

647 Cánovas A, Reverter A, DeAtley KL, Ashley RL, Colgrave ML, Fortes MRS, Islas-Trejo A,  
648 Lehnert S, Porto-Neto L, Rincón G, Silver GA, Snelling WM, Medrano JF, Thomas MG  
649 (2014) Multi-tissue omics analyses reveal molecular regulatory networks for puberty in  
650 composite beef cattle. PLoS One 9:e102551.

651 Castelli FR, Kelley RA, Keane B, Solomon NG (2011) Female prairie voles show social and  
652 sexual preferences for males with longer avpr1a microsatellite alleles. Anim Behav 82:1–  
653 10.

654 Chang C, Lee SO, Wang R-S, Yeh S, Chang T-M (2013) Androgen receptor (AR) physiological  
655 roles in male and female reproductive systems: lessons learned from AR-knockout mice  
656 lacking AR in selective cells. Biol Reprod 89:21.

657 Clayton DH (1990) Mate Choice in Experimentally Parasitized Rock Doves: Lousy Males Lose.  
658 Am Zool 30:251–262.

659 Cloues R, Ramos C, Silver R (1990) Vasoactive intestinal polypeptide-like immunoreactivity  
660 during reproduction in doves: influence of experience and number of offspring. Horm Behav  
661 24:215–231.

662 Dhillon WS, Chaudhri OB, Patterson M, Thompson EL, Murphy KG, Badman MK, McGowan BM,  
663 Amber V, Patel S, Ghatei MA, Bloom SR (2005) Kisspeptin-54 stimulates the hypothalamic-  
664 pituitary gonadal axis in human males. J Clin Endocrinol Metab 90:6609–6615.

665 Dick SS, Ryuzoji A, Morré DM, Morré DJ (2013) Identification of the constitutive ultradian  
666 oscillator of the circadian clock (ENOX1) in *Saccharomyces cerevisiae*. Available at:  
667 [http://file.scirp.org/Html/6-1350145\\_33573.htm](http://file.scirp.org/Html/6-1350145_33573.htm).

668 Fusani L, Barske J, Day LD, Fuxjager MJ, Schlinger BA (2014) Physiological control of  
669 elaborate male courtship: female choice for neuromuscular systems. Neurosci Biobehav  
670 Rev 46 Pt 4:534–546.

671 Ghosh MG, Thompson DA, Weigel RJ (2000) PDZK1 and GREB1 are estrogen-regulated  
672 genes expressed in hormone-responsive breast cancer. Cancer Res 60:6367–6375.

673 Gratao AA, Dahlhoff M, Sinowatz F, Wolf E, Schneider MR (2008) Betacellulin overexpression  
674 in the mouse ovary leads to MAPK3/MAPK1 hyperactivation and reduces litter size by  
675 impairing fertilization. Biol Reprod 78:43–52.

676 Griffiths-Jones S, Moxon S, Marshall M, Khanna A, Eddy SR, Bateman A (2005) Rfam:  
677 annotating non-coding RNAs in complete genomes. Nucleic Acids Res 33:D121–D124.

678 Haas BJ et al. (2013) De novo transcript sequence reconstruction from RNA-seq using the  
679 Trinity platform for reference generation and analysis. Nat Protoc 8:1494–1512.

680 Han H, Sun Z, Luo G, Wang C, Wei R, Wang J (2015) Fluoride exposure changed the structure  
681 and the expressions of reproductive related genes in the hypothalamus-pituitary-testicular  
682 axis of male mice. Chemosphere 135:297–303.

683 Hodes GE et al. (2015) Sex Differences in Nucleus Accumbens Transcriptome Profiles

684 Associated with Susceptibility versus Resilience to Subchronic Variable Stress. *J Neurosci*  
685 35:16362–16376.

686 Jansen R, Batista S, Brooks AI, Tischfield JA, Willemsen G, van Grootheest G, Hottenga J-J,  
687 Milaneschi Y, Mbarek H, Madar V, Peyrot W, Vink JM, Verweij CL, de Geus EJC, Smit JH,  
688 Wright FA, Sullivan PF, Boomsma DI, Penninx BW (2014) Sex differences in the human  
689 peripheral blood transcriptome. *BMC Genomics* 15:33.

690 Jiang H, Lei R, Ding S-W, Zhu S (2014) Skewer: a fast and accurate adapter trimmer for next-  
691 generation sequencing paired-end reads. *BMC Bioinformatics* 15:182.

692 Johnston RF, Johnson SG (1989) Nonrandom Mating in Feral Pigeons. *Condor* 91:23–29.

693 Kannan S, Hui J, Mazooji K, Pachter L, Tse D (2016) Shannon: An Information-Optimal de Novo  
694 RNA-Seq Assembler. *Cold Spring Harbor Labs Journals*. Available at:  
695 <http://biorxiv.org/lookup/doi/10.1101/039230>.

696 Karten HJ, Hodos W (1967) A stereotaxic atlas of the brain of the pigeon: *Columba livia*. Johns  
697 Hopkins Press.

698 Kelly AM, Goodson JL (2014) Hypothalamic oxytocin and vasopressin neurons exert sex-  
699 specific effects on pair bonding, gregariousness, and aggression in finches. *Proc Natl Acad*  
700 *Sci U S A* 111:6069–6074.

701 Lake JI, Lange HS, O'Brien S, Sanford SE, Maney DL (2008) Activity of the hypothalamic-  
702 pituitary-gonadal axis differs between behavioral phenotypes in female white-throated  
703 sparrows (*Zonotrichia albicollis*). *Gen Comp Endocrinol* 156:426–433.

704 Lex A, Gehlenborg N, Strobel H, Vuilleumot R, Pfister H (2014) UpSet: Visualization of  
705 Intersecting Sets. *IEEE Trans Vis Comput Graph* 20:1983–1992.

706 Liley NR (1976) The role of estrogen and progesterone in the regulation of reproductive  
707 behaviour in female ring doves (*Streptopelia risoria*) under long vs. short photoperiods.  
708 *Can J Zool* 54:1409–1422.

709 Lim MM, Wang Z, Olazábal DE, Ren X, Terwilliger EF, Young LJ (2004) Enhanced partner  
710 preference in a promiscuous species by manipulating the expression of a single gene.  
711 *Nature* 429:754–757.

712 Liu J, Li G, Chang Z, Yu T, Liu B, McMullen R, Chen P, Huang X (2016) BinPacker: Packing-  
713 Based De Novo Transcriptome Assembly from RNA-seq Data. *PLoS Comput Biol*  
714 12:e1004772.

715 Liu W, Li D, Liu J, Chen S, Qu L, Zheng J, Xu G, Yang N (2011) A Genome-Wide SNP Scan  
716 Reveals Novel Loci for Egg Production and Quality Traits in White Leghorn and Brown-Egg  
717 Dwarf Layers. *PLoS One* 6:e28600.

718 Lovell-mansbridge C, Birkhead TR (1998) Do female pigeons trade pair copulations for  
719 protection? *Anim Behav* 56:235–241.

720 MacManes MD (2015) Establishing evidenced-based best practice for the de novo assembly  
721 and evaluation of transcriptomes from non-model organisms. [biorxiv.org](http://biorxiv.org):1–23.

722 McCarthy DJ, Chen Y, Smyth GK (2012) Differential expression analysis of multifactor RNA-Seq  
723 experiments with respect to biological variation. *Nucleic Acids Res* 40:4288–4297.

724 Murton RK, Westwood NJ (1977) *Avian breeding cycles*. Oxford University Press, USA.

725 Nelson, Kriegsfield (2017) *Introduction to Behavioral Endocrinology*. Sinauer.

726 Nishida Y, Yoshioka M, St-Amand J (2005) Sexually dimorphic gene expression in the  
727 hypothalamus, pituitary gland, and cortex. *Genomics* 85:679–687.

728 Ondrasek NR (2016) Emerging Frontiers in Social Neuroendocrinology and the Study of  
729 Nonapeptides. *Ethology* 122:443–455.

730 Park J-Y, Su Y-Q, Ariga M, Law E, Jin S-LC, Conti M (2004) EGF-like growth factors as  
731 mediators of LH action in the ovulatory follicle. *Science* 303:682–684.

732 Patro R, Duggal G, Kingsford C (2015) Accurate, fast, and model-aware transcript expression  
733 quantification with Salmon. *bioRxiv.org*:1–35.

734 Peterson MP, Whittaker DJ, Ambreth S, Sureshchandra S, Buechlein A, Podicheti R, Choi J-H,  
735 Lai Z, Mockatis K, Colbourne J, Tang H, Ketterson ED (2012) De novo transcriptome  
736 sequencing in a songbird, the dark-eyed junco (*Junco hyemalis*): genomic tools for an  
737 ecological model system. *BMC Genomics* 13:305.

738 Plachetzki DC, Tsai P-S, Kavanaugh SI, Sower SA (2016) Ancient origins of metazoan  
739 gonadotropin-releasing hormone and their receptors revealed by phylogenomic analyses.  
740 *Gen Comp Endocrinol* 234:10–19.

741 Qin F, Wang X, Liu S, Zheng Y, Li M, Zhang Y, Wang Z (2014) Gene expression profiling of key  
742 genes in hypothalamus-pituitary-gonad axis of rare minnow *Gobiocypris rarus* in response  
743 to EE2. *Gene* 552:8–17.

744 Robinson MD, McCarthy DJ, Smyth GK (2010) edgeR: a Bioconductor package for differential  
745 expression analysis of digital gene expression data. *Bioinformatics* 26:139–140.

746 RStudio Team (2015) RStudio: Integrated Development for R. Available at:  
747 <http://www.rstudio.com/> [Accessed September 1, 2016].

748 Saier MH Jr, Tran CV, Barabote RD (2006) TCDB: the Transporter Classification Database for  
749 membrane transport protein analyses and information. *Nucleic Acids Res* 34:D181–D186.

750 Saldanha CJ, Walters BJ, Fraley GS (2010) Neurons that co-localize aromatase- and  
751 kisspeptin-like immunoreactivity may regulate the HPG axis of the Mallard drake (*Anas*  
752 *platyrhynchos*). *Gen Comp Endocrinol* 166:606–613.

753 Sell-Kubiak E, Duijvesteijn N, Lopes MS, Janss LLG, Knol EF, Bijma P, Mulder HA (2015)  
754 Genome-wide association study reveals novel loci for litter size and its variability in a Large  
755 White pig population. *BMC Genomics* 16:1049.

756 Serão NV, González-Peña D, Beever JE, Faulkner DB, Southey BR, Rodriguez-Zas SL (2013)  
757 Single nucleotide polymorphisms and haplotypes associated with feed efficiency in beef  
758 cattle. *BMC Genet* 14:94.



759 Shan L, Wu Q, Li Y, Shang H, Guo K, Wu J, Wei H, Zhao J, Yu J, Li M-H (2013) Transcriptome  
760 Profiling Identifies Differentially Expressed Genes in Postnatal Developing Pituitary Gland  
761 of Miniature Pig. *DNA Res* Available at:  
762 <http://dnaresearch.oxfordjournals.org/content/early/2013/11/26/dnares.dst051.abstract>.

763 Shimada M, Hernandez-Gonzalez I, Gonzalez-Robayna I, Richards JS (2006) Paracrine and  
764 Autocrine Regulation of Epidermal Growth Factor-Like Factors in Cumulus Oocyte  
765 Complexes and Granulosa Cells: Key Roles for Prostaglandin Synthase 2 and  
766 Progesterone Receptor. *Mol Endocrinol* 20:1352–1365.

767 Silver R (1984) Prolactin and parenting in the pigeon family. *J Exp Zool* 232:617–625.

768 Simão FA, Waterhouse RM, Ioannidis P, Kriventseva EV, Zdobnov EM (2015) BUSCO:  
769 assessing genome assembly and annotation completeness with single-copy orthologs.  
770 *Bioinformatics* 31:3210–3212.

771 Smith-Unna RD, Boursnell C, Patro R, Hibberd JM, Kelly S (2015) TransRate: reference free  
772 quality assessment of de-novo transcriptome assemblies. *bioRxiv*:1–25.

773 Soneson C, Love MI, Robinson MD (2015) Differential analyses for RNA-seq: transcript-level  
774 estimates improve gene-level inferences. *F1000Res* 4:1521–1519.

775 Song L, Florea L (2015) Rcorrector: efficient and accurate error correction for Illumina RNA-seq  
776 reads. *Gigascience* 4:48.

777 Sower SA, Freamat M, Kavanaugh SI (2009/3) The origins of the vertebrate hypothalamic–  
778 pituitary–gonadal (HPG) and hypothalamic–pituitary–thyroid (HPT) endocrine systems:  
779 New insights from lampreys. *Gen Comp Endocrinol* 161:20–29.

780 Staes N, Koski SE, Helsen P, Fransen E, Eens M, Stevens JMG (2015) Chimpanzee sociability  
781 is associated with vasopressin (Avpr1a) but not oxytocin receptor gene (OXTR) variation.  
782 *Horm Behav* 75:84–90.

783 Sun L, Wang C, Huang L, Wu M, Zuo Z (2012) Transcriptome analysis of male and female  
784 *Sebastiscus marmoratus*. *PLoS One* 7:e50676.

785 Trabzuni D, Ramasamy A, Imran S, Walker R, Smith C, Weale ME, Hardy J, Ryten M (2013)  
786 Widespread sex differences in gene expression and splicing in the adult human brain. *Nat*  
787 *Commun* 4:2771.

788 Turner LM, Young AR, Römler H, Schöneberg T, Phelps SM, Hoekstra HE (2010) Monogamy  
789 evolves through multiple mechanisms: evidence from V1aR in deer mice. *Mol Biol Evol*  
790 27:1269–1278.

791 Usherwood JR (2008) Collared doves *Streptopelia decaocto* display with high, near-maximal  
792 muscle powers, but at low energetic cost. *J Avian Biol* 39:19–23.

793 Vézina F, Salvante KG, Williams TD (2003) The metabolic cost of avian egg formation: possible  
794 impact of yolk precursor production? *J Exp Biol* 206:4443–4451.

795 Wacker DW, Wingfield JC, Davis JE, Meddle SL (2010) Seasonal changes in aromatase and  
796 androgen receptor, but not estrogen receptor mRNA expression in the brain of the free-  
797 living male song sparrow, *Melospiza melodia morphna*. *J Comp Neurol* 518:3819–3835.

798 Walters KA, Middleton LJ, Joseph SR, Hazra R, Jimenez M, Simanainen U, Allan CM,  
799 Handelsman DJ (2012) Targeted loss of androgen receptor signaling in murine granulosa  
800 cells of preantral and antral follicles causes female subfertility. *Biol Reprod* 87:151.

801 Walum H, Westberg L, Henningsson S, Neiderhiser JM, Reiss D, Igl W, Ganiban JM, Spotts EL,  
802 Pedersen NL, Eriksson E, Lichtenstein P (2008) Genetic variation in the vasopressin  
803 receptor 1a gene (AVPR1A) associates with pair-bonding behavior in humans. *Proceedings*  
804 *of the National Academy of Sciences* 105:14153–14156.

805 Wang R-L, Bencic D, Lazorchak J, Villeneuve D, Ankley GT (2011) Transcriptional regulatory  
806 dynamics of the hypothalamic-pituitary-gonadal axis and its peripheral pathways as  
807 impacted by the 3-beta HSD inhibitor trilostane in zebrafish (*Danio rerio*). *Ecotoxicol*  
808 *Environ Saf* 74:1461–1470.

809 Waterhouse RM, Tegenfeldt F, Li J, Zdobnov EM, Kriventseva EV (2013) OrthoDB: a  
810 hierarchical catalog of animal, fungal and bacterial orthologs. *Nucleic Acids Res* 41:D358–  
811 D365.

812 Weickert CS, Elashoff M, Richards AB, Sinclair D, Bahn S, Paabo S, Khaitovich P, Webster MJ  
813 (2009) Transcriptome analysis of male–female differences in prefrontal cortical  
814 development. *Mol Psychiatry* 14:558–561.

815 Xu J, Huang W, Zhong C, Luo D, Li S, Zhu Z, Hu W (2011) Defining global gene expression  
816 changes of the hypothalamic-pituitary-gonadal axis in female sGnRH-antisense transgenic  
817 common carp (*Cyprinus carpio*). *PLoS One* 6:e21057.

818 Young IT (1977) Proof without prejudice: use of the Kolmogorov-Smirnov test for the analysis of  
819 histograms from flow systems and other sources. *J Histochem Cytochem* 25:935–941.

820 Zhang X, Hecker M, Park J-W, Tompsett AR, Newsted J, Nakayama K, Jones PD, Au D, Kong  
821 R, Wu RSS, Giesy JP (2008) Real-time PCR array to study effects of chemicals on the  
822 Hypothalamic-Pituitary-Gonadal axis of the Japanese medaka. *Aquat Toxicol* 88:173–182.

823 Zhang Z, Wang Y, Wang S, Liu J, Warren W, Mitreva M, Walter RB (2011) Transcriptome  
824 Analysis of Female and Male *Xiphophorus maculatus* Jp 163 A. *PLoS One* 6:e18379.

825 Zhang Z, Wang Y, Wang S, Liu J, Warren W, Mitreva M, Walter RB (2011) Transcriptome  
826 Analysis of Female and Male *Xiphophorus maculatus* Jp 163 A. *PLoS One* 6:e18379  
827 Available at:  
828 <http://journals.plos.org/plosone/article/asset?id=10.1371/journal.pone.0018379.PDF>.
